# Supplementary material for: Epidemiology of Hepatitis C virus infection among incarcerated populations in North Dakota
Source: PubMed Central journal article supplement (PMC8963564; doi:10.1371/journal.pone.0266047), 2022-03-29
Supplement: pone.0266047.s002.pdf [file pone.0266047.s002.pdf]

S2 Table

|                | IVDU         | No IVDU      |        |
|----------------|--------------|--------------|--------|
| Sex            |              |              | <.0001 |
| Female         | 680 (26.49)  | 538 (11.41)  |        |
| Male           | 1887 (73.51) | 4178 (88.59) |        |
| Race/ethnicity |              |              | <.0001 |
| Black          | 30 (1.17)    | 392 (8.31)   |        |
| Caucasian      | 1351 (52.63) | 1827 (38.74) |        |
| HIS            | 79 (3.08)    | 195 (4.13)   |        |
| NAT            | 533 (20.76)  | 551 (11.68)  |        |
| Others         | 574 (22.36)  | 1751 (37.13) |        |
